# Supplementary material
Source: publisher site journal article supplement (https://www.dovepress.com/get_supplementary_file.php?f=514702.docx)
Supplement: Supplementary file 1 [file get_supplementary_file.php]

**Supplementary Figure 1**


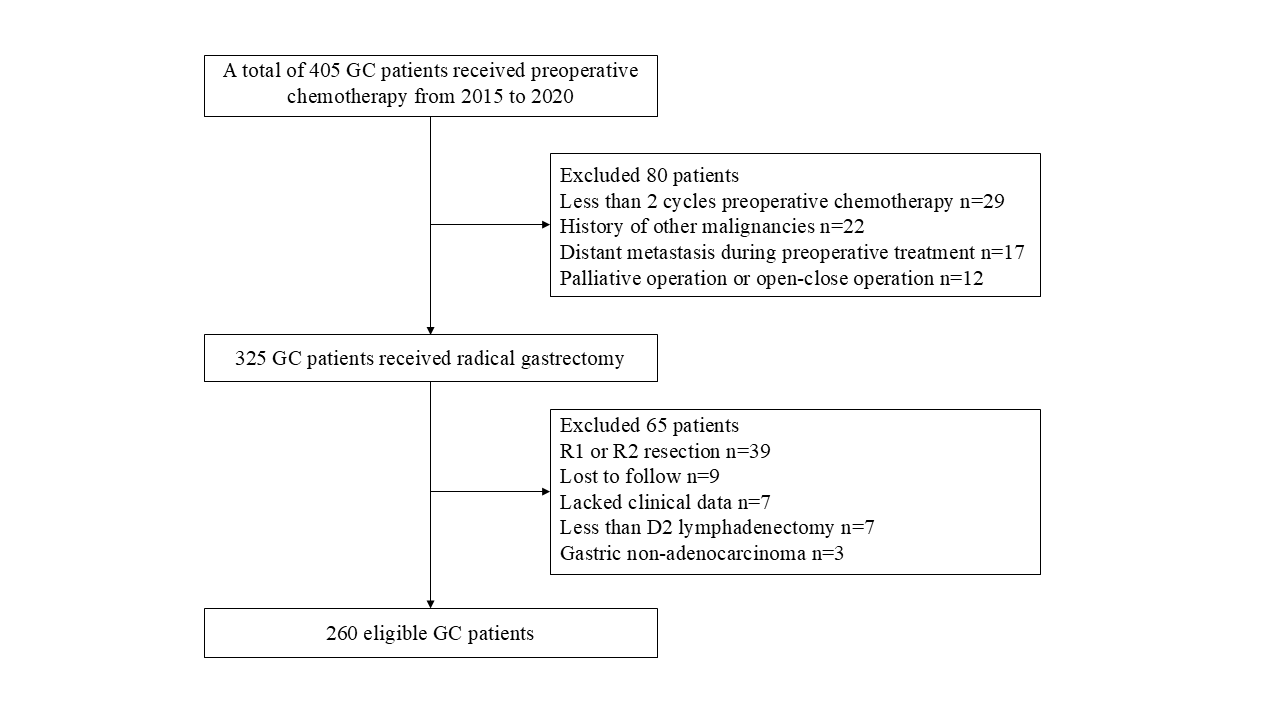


**Supplementary Figure 1. Flowchart of patients enrollment.**

**Supplementary Table 1** **Clinical and pathological data of the study population**

| **Variable** | **N(%)** |
| --- | --- |
| **Gender** |  |
| Male | 187(71.9%) |
| Female | 73(28.1%) |
| **Age** |  |
| ≤60 | 136(52.3%) |
| ＞60 | 124(47.7%) |
| **Tumor size** |  |
| ≤4.5 | 153(58.8%) |
| ＞4.5 | 107(41.2%) |
| **Tumor location** |  |
| Upper | 78(30.0%) |
| Middle | 22(8.5%) |
| Lower | 124(47.7%) |
| Total | 36(13.8%) |
| **Lymphvascular invasion** |  |
| No | 212(81.5%) |
| Yes | 48(18.5%) |
| **Perineural invasion** |  |
| No | 216(83.1%) |
| Yes | 44(16.9%) |
| **ypT stage** |  |
| ypT0/T1/T2 | 84(32.3%) |
| ypT3/T4 | 176(67.7%) |
| **ypN stage** |  |
| ypN0 | 100(38.5%) |
| ypN1 | 56(21.5%) |
| ypN2 | 51(19.6%) |
| ypN3 | 53(20.4%) |
| **Tumor differentation** |  |
| differentation | 118(45.4%) |
| undifferentation | 142(54.6%) |
| **AJCC 8th** |  |
| 1 | 55(21.2%) |
| 2 | 82(31.5%) |
| 3 | 123(47.3%) |
| **Surgery type** |  |
| Partial gastrectomy | 139(53.5%) |
| Total gastrectomy | 121(46.5%) |
| **TRG grading** |  |
| 0/1 | 64(24.6%) |
| 2/3 | 196(75.4%) |
